# Supplementary material for: Enzymatic noncovalent synthesis of peptide assemblies generates multimolecular crowding in cells for biomedical applications
Source: Royal Society of Chemistry journal article supplement (doi:10.1039/d1cc05565h), 2021-01-01
Supplement: d1cc05565h1.pdf [file d1cc05565h1.pdf]

**Table S1.** The LogP values of the precursors and products for ENS

| Enzyme   | Precursor | LogP  | Product   | LogP |
|----------|-----------|-------|-----------|------|
| ALP      | <b>1</b>  | 3.80  | <b>2</b>  | 4.97 |
|          | <b>3</b>  | 2.05  | <b>4</b>  | 3.63 |
|          | <b>5</b>  | 3.13  | <b>6</b>  | 4.70 |
| ENTK     | <b>7</b>  | -1.75 | <b>9</b>  | 1.02 |
| ALP      | <b>10</b> | 3.03  | <b>11</b> | 4.14 |
|          | <b>12</b> | 0.45  | <b>13</b> | 1.06 |
|          | <b>14</b> | 3.56  | <b>15</b> | 4.39 |
|          | <b>16</b> | 2.82  | <b>17</b> | 3.30 |
| Esterase | <b>19</b> | 1.34  | <b>18</b> | 1.15 |
|          | <b>20</b> | 0.75  |           |      |
|          | <b>21</b> | 0.12  |           |      |
|          | <b>22</b> | 0.10  |           |      |
